# Supplementary material
Source: PubMed Central journal article supplement (PMC1895483)
Supplement: blood_2005-08-3498_2.pdf [file blood_2005-08-3498_2.pdf]

|                                                  | <i>Mil-AF4</i>           | <i>Mil-AF9</i>           |
|--------------------------------------------------|--------------------------|--------------------------|
| <b>Young mice</b>                                | 1.85198 (0.79144)<br>N=2 | 0.88288 (0.37664)<br>N=3 |
| <b>Older mice with<br/>hematological disease</b> | 0.62223 (0.25595)<br>N=4 | 0.59791 (0.10743)<br>N=3 |
